# Supplementary material
Source: publisher figshare collection journal article supplement (https://karger.figshare.com/ndownloader/files/39591256)
Supplement: Supplementary file 1 [file 39591256]

**Supplementary Table 1:** Treatment characteristics of 176 patients treated with I-125 plaque brachytherapy with target tumor apex radiation dose of 85 gray, with at least 3 months follow-up.

| **No. receiving I-125 plaque brachytherapy** | | 176 |
| --- | --- | --- |
| **Plaque shapes** | | |
|  | No. round (%) | 69 (39%) |
| No. round with notch (%) | 35 (20%) |
| No. semi-elliptical (%) | 21 (12%) |
| No. semi-elliptical with notch (%) | 30 (17%) |
| No. semi-circular with limbus curve (%) | 10 (6%) |
| No. semi-circular with notch (%) | 2 (1%) |
| No. unknown (%) | 9 (5%) |
| **Plaque size, mm (N=167)** | | |
|  | Mean diameter ± SD | 19 ± 3 |
| **Plaque treatment time, hours (N=174)** | | |
|  | Median (range) | 71.9 (67.7-76.7) |
| **TTT adjuvant therapy*** | | |
|  | No. with 3 total TTT sessions (%) | 101 (57%) |
| No. with 2 total TTT sessions (%) | 19 (11%) |
| No. with 1 total TTT sessions (%) | 36 (20%) |
| No. awaiting further planned TTT (%) | 7 (4%) |
|  | No. without any TTT (%) | 13 (7%) |

I-125 = Iodine-125; TTT=transpupillary thermotherapy; SD = standard deviation, mm = millimeters

*The number awaiting further planned TTT are included with the number receiving TTT at plaque removal, if applicable, but not in tabulations of total sessions number. Total session number includes TTT at plaque removal.
